# Supplementary material
Source: PubMed Central journal article supplement (PMC4250361)

**Supplemental Figure 1 – MKP-2 expression fluctuates with doxycycline addition, does not increase with EGF treatment**

**A:** Western blot analysis of GH4 clone #10 cells treated  $\pm$ doxycycline. GH4 clone #10 cells expressing doxycycline-inducible 3HA-V12Ras (from Fig 1) were serum-starved (0.05% FBS) overnight. Serum-starved media containing 2  $\mu$ g/mL doxycycline was added on days 1, 3, and 5, and cells were harvested daily for 6 days. For Day 1, (-) Dox cells were harvested after overnight serum-starvation and were not treated with doxycycline. **B:** Western blot analysis of GH4 cells treated (-) EGF and (+) EGF. GH4 cells were maintained in serum-complete media. Complete media with or without 30 ng/mL EGF was added on days 1, 3, and 5, and cells were harvested daily for 6 days. Whole-cell extracts (50  $\mu$ g) were separated by SDS-PAGE and probed with the antibodies listed. (n=3 independent experiments; a representative experiment is shown)

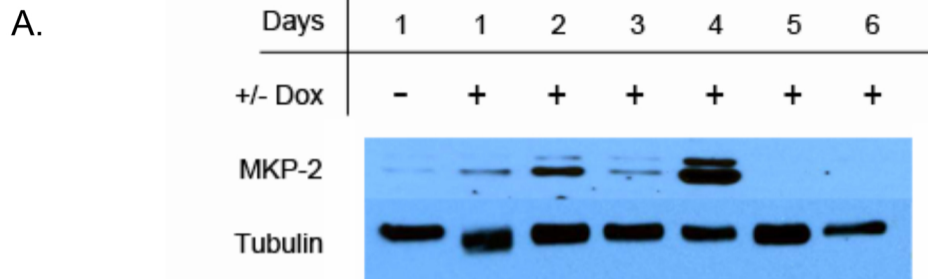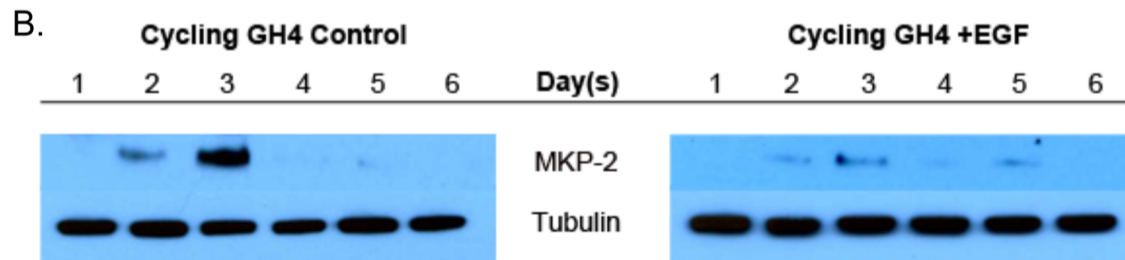

Supplement: me-14-1168.pdf [file me-14-1168.pdf]
